# Supplementary material
Source: HighWire-hosted journal article supplement (https://genome.cshlp.org/content/suppl/2010/05/04/20.5.589)
Supplement: SupplPaperREV3ok.pdf [file SupplPaperREV3ok.pdf]

## **Supplemental Material**

### Reprogramming of the miRNA networks in cancer and leukemia

#### **Datasets**

The expression data analyzed in this study can be accessed at the NCBI Gene Expression Omnibus (<http://www.ncbi.nlm.nih.gov/geo>) under accession nos. GSE8126 and GSE7055 (Ambs et al. 2008), GSE17155 (Fassan et al. 2009), GSE3467 (He et al. 2005), GSE7828 (Schetter et al. 2008), GSE6857 (Budhu et al. 2008), GSE16654 (Chin et al. 2009), and GSE14936 (Seike et al. 2009), and at ArrayExpress ([www.ebi.ac.uk/microarray-as/ae](http://www.ebi.ac.uk/microarray-as/ae)) under accession nos. E-TABM-866 (Pineau et al.), E-TABM-664 (Bloomston et al. 2007), E-TABM-762 and E-TABM-763 (Visone et al. 2009), E-TABM-508 (Pichiorri et al. 2008), E-TABM-429 (Garzon et al. 2008a), E-TABM-434 (Petrocca et al. 2008), E-TABM-405 (Garzon et al. 2008b), E-TABM-343 (Iorio et al. 2007), E-TABM-41 and E-TABM-42 (Calin et al. 2005), E-TABM-48 (Roldo et al. 2006), E-TABM-22 (Yanaihara et al. 2006), E-TABM-23 (Iorio et al. 2005), E-TABM-46, E-TABM-47, E-TABM-49, and E-TABM-50 (Volinia et al. 2006), and E-MEXP-1796 (Godlewski et al. 2008), E-TABM-37 (Ciafre et al. 2005), E-TABM-341 (Ueda et al.). The additional samples we used here were unpublished or previously reported in context-specific papers (Baffa et al. 2009; Garzon et al. 2006; Garzon et al. 2007; Zhang et al. 2008). The respective accession numbers are: E-TABM-969 and E-TABM-970 for normal tissues, E-TABM-971 for breast cancer, E-TABM-972 and E-TABM-974 for acute myeloid leukemia, E-TABM-973 for chronic lymphocytic leukemia and E-TABM-975 for ovarian cancer.

## Supplemental Results and Discussion

**The miRNA specificity and network in normal tissues and ES differentiation.** Embryonic cell types, such as embryonic bodies, trophoblasts, endoderm, or other stem cells including induced pluripotent stem cells (iPS) also harbored high levels of hsa-miR-302. Since hsa-miR-302 expression only partially decreased throughout these stages of ES differentiation, its IC in embryonic tissues was low (0.5). The miRNAs which had highest tissue specificity in embryos were: hsa-miR-211 in 14 day embryoid bodies (EBs), hsa-miR-10b, hsa-miR-218, hsa-miR-122, and hsa-miR-148a in spontaneous differentiated monolayers, hsa-miR-138 and hsa-miR-338-3p in 7 day EBs, and hsa-miR-99a in trophoblast (Supplemental Figure 2 and Supplemental Table III). The information content (IC) of hsa-miR-302 genes is in our datasets even higher than that found by Landgraf, who considered a lower number of tissues/organs/systems. After hsa-miR-302, the most specific miRNAs are hsa-miR-338-5p, hsa-miR-323-3p, hsa-miR-335, with highest expression in epidermis/nervous system, nervous system and breast respectively (Supplemental Figure 1 and Supplemental Table I). hsa-miR-122 is the miRNA with the highest IC difference between ours and the sequencing dataset. hsa-miR-371-5p is here well represented in embryonic cell types, since we have high hsa-miR-371-5p expression in embryoid bodies, not assayed in the clones' dataset. hsa-miR-129-3p is specific for nervous system in both datasets. We detected hsa-miR-142-5p in hematopoietic system and connective tissues. hsa-miR-9, hsa-miR-128 and hsa-miR-138 were nervous system specific in both datasets. We report twice as many different tissue groups that in the clones' dataset, thus we expected less tissue specific miRNAs and lower information contents. Our hypothesis is confirmed by the IC table (Supplemental Table I). Nevertheless, the IC distributions are very similar: 25 miRNAs with IC higher than 1.35 for the microarrays, in comparison to 29 for the clones. The only notable exception to the lower IC is hsa-miR-302a/b/c. This variation might be

due to the fact that we assayed different cell types of embryonic origin, in comparison to only ES cells for the clones.

## **Supplemental Methods**

**Tissue specificity.** First, all samples were classified according to their organ-, tissue- and cell-type; then the normal samples were grouped in specific systems and the disease samples in specific pathological states. To assess the specificity of miRNA expression across groups, we needed to estimate what fraction of the total, for a given miRNA belonged to each single group. Therefore, we used the procedure described in the first miRNA expression atlas (Landgraf et al. 2007), with the only exception that we called  $Em,t$  the value of miRNA  $m$  in the group  $t$  referred to as "mean expression value (subtracted of the background value, 100). From here onwards, we essentially proceeded as the reference. The specificity score varies between 0, when the expression level of the miRNA  $m$  is the same across all tissues, and  $\log_2$  of the number of tissue types, when only one tissue expresses the miRNA. To minimize artifacts from miRNAs or tissues with very small expression levels, we considered only miRNAs with a total expression value above 10 times the number of normal tissues and above 100 times the number of cancer types; with a minimal expression value (after background subtraction) of 100. For the calculation of overall specificity, we thus included 130 and 133 different mature miRNAs for normal tissues and cancer, respectively. Therefore, it is possible that we missed some specifically expressed miRNAs that in our data had either very low expression or were specific to tissues/diseases that we did not sample sufficiently.

**Array CGH.** Each cancer sample was compared to a healthy control on a two channel oligonucleotide-based platform. Each gene was evaluated in each sample by using the

normalized log2 ratio (cancer over control). Different probes related to the same gene were averaged (gene symbols were used as keys). Data were normalized according to the providers. As a pre-processing step we retained only those genes with high variability (standard deviation > 0.2). For each gene we computed the 5<sup>th</sup> and 95<sup>th</sup> percentiles (only for genes measured in at least 300 samples). A gene harboring recurrent deletions in tumors would result in a low 5<sup>th</sup> percentile log2 ratio (negative), while one with amplifications would display a high 95<sup>th</sup> percentile (positive).

To identify the miRNAs with structural alterations in cancer we followed the following procedure (illustrated here for amplifications): we selected all miRNA families where at least 1 member was significantly amplified ( $p < 0.05$ ). We defined the family p-value for amplification, as the product of the amplification p-values for each family member (including also the non significant miRNAs), with the following exceptions: i) replicated identical mature miRNAs were considered only when mapping on different loci (i.e. represented by different host genes or flanking genes); ii) physically clustered family members were scored only once. The distinct human genes we assayed in the aCGH dataset were 19,654 in total. We studied 530 distinct miRNA precursors in 308 chromosomal loci, corresponding to 471 different mature miRNAs and 356 distinct miRNA families. The average distance between the miRNAs and their flanking genes was of 188 Kb for the 5' and of 240 Kb for the 3' gene. The number of miRNA loci deleted/amplified in cancer was not significantly different from expectation, when compared to the whole coding genome (in both cases  $p \gg 0.05$ ).

Bootstrap analysis (random swap between cancer and control channels) was used to simulate gene specific 5<sup>th</sup> and 95<sup>th</sup> percentiles. Gene-specific p-values for deletions were calculated as the percentage of resampled 5<sup>th</sup> percentiles which exceeded the original 5<sup>th</sup> percentile. We had to take in consideration two phenomena, associated to aCGH, but not linked to cancer: sex

chromosomes and polymorphic copy number variations (CNV). Since the control sample was more frequently from male, while roughly half of the tumors were of female origin, the Y-chromosome genes were incorrectly expected to appear as deleted. Conversely, we expected the X chromosome genes, except for those belonging to the pseudo-autonomic region, to incorrectly appear as amplified. Genes located in the sex chromosomes were indeed behaving exactly as expected (data not shown). Polymorphic CNVs could also display large fold-changes, resulting in high 95<sup>th</sup> or low 5<sup>th</sup> percentiles. But, we expected that such CNVs, not associated to cancer, would not display significant p-values. Indeed, most polymorphic sites for copy number variations (CNVs) did not filtered through the aCGH assay, since the different alleles were balanced in the cancer and control groups. Only a small percentage of miRNA coincided with polymorphic CNVs and that fraction was not enriched in the cancer subset (data not shown).

**Supplemental Table I.** Expression levels of tissue specific microRNAs in normal tissues.  
Sorted by information content (IC)

| Name            | Tissue Specificity                      | Expression Value | Information Content | Chromosomal Location                                 |
|-----------------|-----------------------------------------|------------------|---------------------|------------------------------------------------------|
| hsa-miR-302a    | EMBRYO                                  | 4380             | 4.00                | 4:113569339-113569407                                |
| hsa-miR-302c    | EMBRYO                                  | 1709             | 3.99                | 4: 113569519-113569586                               |
| hsa-miR-302b    | EMBRYO                                  | 4929             | 3.73                | 4: 113569641-113569713                               |
| hsa-miR-338-5p  | EPIDERMIS / NERVOUS SYSTEM              | 573 / 451        | 2.51                | 17: 79099683-79099749                                |
| hsa-miR-323-3p  | NERVOUS SYSTEM                          | 167              | 2.47                | 14: 101492069-101492154                              |
| hsa-miR-335     | BREAST                                  | 322              | 2.37                | 7: 130135952-130136045                               |
| hsa-miR-124     | NERVOUS SYSTEM                          | 533              | 2.33                | 8:9,798,308-9,798,392<br>8:65,454,260-65,454,368     |
| hsa-miR-139-5p  | NERVOUS SYSTEM                          | 245              | 2.27                | 11: 72326107-72326174                                |
| hsa-miR-371-5p  | EMBRYO                                  | 443              | 1.93                | 19: 54290929-54290995                                |
| hsa-miR-325     | EPIDERMIS                               | 129              | 1.91                | X: 76225829-76225926                                 |
| hsa-miR-133a    | CARDIOVASCULAR SYSTEM / SKELETAL MUSCLE | 464/ 661         | 1.88                | 18:17,659,657-17,659,744<br>20:60,572,564-60,572,665 |
| hsa-miR-184     | RESPIRATORY SYSTEM                      | 259              | 1.86                | 15: 79502130-79502213                                |
| hsa-miR-133b    | CARDIOVASCULAR SYSTEM / SKELETAL MUSCLE | 394 / 371        | 1.83                | 6: 52013721-52013839                                 |
| hsa-miR-211     | NERVOUS SYSTEM                          | 180              | 1.78                | 15: 31357235-31357344                                |
| hsa-miR-9       | NERVOUS SYSTEM                          | 1346             | 1.73                | 1:154656757-154656845<br>5:87998427-87998513         |
| hsa-miR-370     | NERVOUS SYSTEM                          | 146              | 1.72                | 14: 101377476-101377550                              |
| hsa-miR-376c    | EPIDERMIS                               | 121              | 1.61                | 14: 101506027-101506092                              |
| hsa-miR-132     | NERVOUS SYSTEM                          | 552              | 1.59                | 17: 1953202-1953302                                  |
| hsa-miR-1       | SKELETAL MUSCLE / CARDIOVASCULAR SYSTEM | 500 / 350        | 1.56                | 20:60,561,958-60,562,028<br>18:17,662,963-17,663,047 |
| hsa-miR-215     | KIDNEY                                  | 2630             | 1.55                | 1: 220291195-220291304                               |
| hsa-miR-339-5p  | LIVER                                   | 107              | 1.54                | 7: 1062569-1062662                                   |
| hsa-miR-330-3p  | LIVER                                   | 125              | 1.53                | 19: 46142252-46142345                                |
| hsa-miR-342-5p  | EPIDERMIS                               | 326              | 1.49                | 14: 100575992-100576090                              |
| hsa-miR-199b-5p | RESPIRATORY SYSTEM                      | 144              | 1.39                | 9: 131007000-131007109                               |
| hsa-miR-129-3p  | NERVOUS SYSTEM                          | 266              | 1.36                | 11: 43602944-43603033                                |

**Supplemental Table II.** Normal Tissues grouped by systems

| <b>Normal Organism Part</b>                                                                                                                                                                                            | <b>Normal System</b>    | <b>N of Samples</b> |
|------------------------------------------------------------------------------------------------------------------------------------------------------------------------------------------------------------------------|-------------------------|---------------------|
| ADIPOSE TISSUE                                                                                                                                                                                                         | Adipose                 | 5                   |
| BREAST                                                                                                                                                                                                                 | Breast                  | 4                   |
| HEART                                                                                                                                                                                                                  | Cardiovascular System   | 6                   |
| DERMAL FIBROBLAST                                                                                                                                                                                                      | Connective Tissue       | 11                  |
| EMBRYONIC STEM CELLS / DEFINITIVE ENDODERM / SPONTANEOUS DIFFERENTIATED MONOLAYERS / EMBRYONIC BODIES / INDUCED PLURIPOTENT STEM CELLS/                                                                                | Embryo                  | 68                  |
| THYROID / PANCREAS / PITUITARY /                                                                                                                                                                                       | Endocrine Gland         | 107                 |
| SKIN                                                                                                                                                                                                                   | Epidermis               | 20                  |
| ESOPHAGUS / COLON / STOMACH / RECTUM / SIGMA / SMALL INTESTINE                                                                                                                                                         | Gastrointestinal System | 394                 |
| BLOOD / BONE MARROW / LYMPHONODE / THYMUS / TONSIL / SPLEEN                                                                                                                                                            | Hematopoietic System    | 225                 |
| KIDNEY                                                                                                                                                                                                                 | Kidney                  | 19                  |
| LIVER                                                                                                                                                                                                                  | Liver                   | 38                  |
| OCCIPITAL CORTEX / TEMPORAL CORTEX / PRIMARY VISUAL CORTEX / THALAMUS / BRAIN / MEDULLA / CEREBELLUM / PREFRONTAL CORTEX / AUDITORY CORTEX / AMYGDALA/ HYPOTHALAMUS / MOTOR CORTEX / CAUDATE NUCLEUS / PARIETAL CORTEX | Nervous System          | 58                  |
| PLACENTA                                                                                                                                                                                                               | Placenta                | 6                   |
| FALLOPIAN TUBE / CERVIX / OVARY / PROSTATE / TESTIS                                                                                                                                                                    | Reproductive System     | 59                  |
| LUNG / TRACHEA                                                                                                                                                                                                         | Respiratory System      | 75                  |
| SKELETAL MUSCLE                                                                                                                                                                                                        | Skeletal Muscle         | 6                   |
| BLADDER                                                                                                                                                                                                                | Urinary System          | 6                   |

**Supplemental Table III.** Expression levels of tissue specific microRNAs during differentiation of embryonic stem cells (ES) . Sorted by information content (IC)

| Name           | Embryonic tissue Specificity        | Expression Value  | IC   | Chromosomal Location                                   |
|----------------|-------------------------------------|-------------------|------|--------------------------------------------------------|
| hsa-miR-211    | EB 14 day                           | 165               | 2.65 | 15: 31357235-31357344                                  |
| hsa-miR-10b    | Monolayer                           | 909               | 2.20 | 2: 177015031-177015140                                 |
| hsa-miR-138    | EB 7 day                            | 181               | 1.88 | 3:44,130,708-44,130,806<br>16:55,449,931-55,450,014    |
| hsa-miR-218    | Monolayer                           | 665               | 1.65 | 4:20,138,996-20,139,105<br>5:168,127,729-168,127,838   |
| hsa-miR-122    | Monolayer                           | 3660              | 1.57 | 18: 56118306-56118390                                  |
| hsa-miR-99a    | Trophoblast                         | 197               | 1.54 | 21: 17911409-17911489                                  |
| hsa-miR-215    | Monolayer /Definitive Endoderm      | 1673 / 325        | 1.42 | 1: 220291195-220291304                                 |
| hsa-miR-338-3p | EB 7 day                            | 432               | 1.26 | 17: 79099683-79099749                                  |
| let-7e         | iPS / Embryonic Stem Cells          | 284 / 181         | 1.23 | 19: 52196039-52196117                                  |
| hsa-miR-371-5p | EB 14 day / EB 7 day / ES           | 1424 / 6274 / 848 | 1.20 | 19: 54290929-54290995                                  |
| hsa-miR-148a   | Monolayer                           | 158               | 1.18 | 7: 25989539-25989606                                   |
| hsa-miR-181c   | Trophoblast / Monolayer             | 1500 / 927        | 1.07 | 19: 13985513-13985622                                  |
| hsa-miR-203    | EB 14 day / Monolayer / Trophoblast | 974 / 750 / 934   | 1.05 | 14: 104583742-104583851                                |
| hsa-miR-181a   | Trophoblast / Monolayer             | 2943 / 1106       | 0.99 | 1:197,094,796-197,094,905<br>9:126,494,542-126,494,651 |
| hsa-miR-181b   | Trophoblast / Monolayer             | 8290 / 3397       | 0.93 | 1:197,094,625-197,094,734<br>9:126,495,810-126,495,898 |
| hsa-miR-192    | Monolayer / Definitive Endoderm     | 1804 /474         | 0.84 | 11: 64658609-64658718                                  |
| hsa-miR-150    | EB 7 day / iPS                      | 501 / 347         | 0.83 | 19: 50004042-50004125                                  |
| hsa-miR-139-3p | iPS / ES                            | 477 / 250         | 0.82 | 11: 72326107-72326174                                  |
| hsa-miR-27b    | Trophoblast / Monolayer             | 554 / 317         | 0.77 | 9: 97847727-97847823                                   |
| hsa-miR-10a    | Monolayer                           | 2547              | 0.75 | 17: 46657200-46657309                                  |

**Legend:** Embryonic Bodies: EB; Spontaneous Differentiated Monolayer: Monolayer; Induced Pluripotent Stem Cells: iPS; Embryonic Stem Cells: ES.

**Supplemental Table IV.** Up-regulated microRNAs in 31 types of solid cancers (2532 cancers samples vs. 806 corresponding normal samples)

| Parametric p-value     | FDR                    | intensities in Solid Cancers | intensities in Normal Tissues | Fold change- | microRNA            | Chromosomal location |
|------------------------|------------------------|------------------------------|-------------------------------|--------------|---------------------|----------------------|
| $< 1 \times 10^{-07}$  | $< 1 \times 10^{-07}$  | 967                          | 617.9                         | <b>1.57</b>  | <b>hsa-miR-21</b>   | 17q23.1              |
| $< 1 \times 10^{-07}$  | $< 1 \times 10^{-07}$  | 1378.2                       | 917.7                         | <b>1.5</b>   | <b>hsa-miR-25</b>   | 7q22.1               |
| $< 1 \times 10^{-07}$  | $< 1 \times 10^{-07}$  | 902.7                        | 626.3                         | <b>1.44</b>  | <b>hsa-miR-20a</b>  | 13q31.3              |
| $< 1 \times 10^{-07}$  | $< 1 \times 10^{-07}$  | 925.7                        | 646.9                         | <b>1.43</b>  | <b>hsa-miR-17</b>   | 13q31.3              |
| $< 1 \times 10^{-07}$  | $< 1 \times 10^{-07}$  | 652.3                        | 469                           | <b>1.39</b>  | <b>hsa-miR-106a</b> | Xq26.2               |
| $< 1 \times 10^{-07}$  | $< 1 \times 10^{-07}$  | 410                          | 297.8                         | <b>1.38</b>  | <b>hsa-miR-106b</b> | 7q22.1               |
| $1.30 \times 10^{-06}$ | $1.08 \times 10^{-05}$ | 918.8                        | 697.9                         | <b>1.32</b>  | <b>hsa-miR-146a</b> | 5q34                 |
| $< 1 \times 10^{-07}$  | $< 1 \times 10^{-07}$  | 11893.3                      | 9370.9                        | <b>1.27</b>  | <b>hsa-miR-92a</b>  | 13q31.3,Xq26.2       |
| $1.60 \times 10^{-06}$ | $1.29 \times 10^{-05}$ | 2354.9                       | 1919.4                        | <b>1.23</b>  | <b>hsa-miR-103</b>  | 5q35.1,20p13         |
| $< 1 \times 10^{-07}$  | $< 1 \times 10^{-07}$  | 289.4                        | 237.8                         | <b>1.22</b>  | <b>hsa-miR-130b</b> | 22q11.21             |
| $6.81 \times 10^{-05}$ | 0.000387               | 750.4                        | 615.7                         | <b>1.22</b>  | <b>hsa-miR-30c</b>  | 1p34.2,6q13          |
| $< 1 \times 10^{-07}$  | $< 1 \times 10^{-07}$  | 452.7                        | 372                           | <b>1.22</b>  | <b>hsa-miR-93</b>   | 7q22.1               |
| $3.90 \times 10^{-06}$ | $2.74 \times 10^{-05}$ | 2116.4                       | 1743.6                        | <b>1.21</b>  | <b>hsa-miR-107</b>  | 10q23.31             |
| $< 1 \times 10^{-07}$  | $< 1 \times 10^{-07}$  | 297.7                        | 248                           | <b>1.2</b>   | <b>hsa-miR-30e</b>  | 1p34.2               |
| $< 1 \times 10^{-07}$  | $< 1 \times 10^{-07}$  | 227                          | 191.9                         | <b>1.18</b>  | <b>hsa-miR-15a</b>  | 13q14.2              |
| 0.000433               | 0.002                  | 1209.2                       | 1031.6                        | <b>1.17</b>  | <b>hsa-miR-181b</b> | 1q32.1,9q33.3        |
| $< 1 \times 10^{-07}$  | $< 1 \times 10^{-07}$  | 191.3                        | 164.8                         | <b>1.16</b>  | <b>hsa-miR-15b</b>  | 3q25.33              |
| 0.000605               | 0.002648               | 508.2                        | 438.5                         | <b>1.16</b>  | <b>hsa-miR-181a</b> | 1q32.1,9q33.3        |
| 0.000442               | 0.002002               | 333.8                        | 287                           | <b>1.16</b>  | <b>hsa-miR-32</b>   | 9q31.3               |
| $5.10 \times 10^{-06}$ | $3.40 \times 10^{-05}$ | 160                          | 147.3                         | <b>1.09</b>  | <b>hsa-miR-345</b>  | 14q32.2              |
| 0.000494               | 0.0022                 | 208.1                        | 193.5                         | <b>1.08</b>  | <b>hsa-miR-34a</b>  | 1p36.22              |
| 0.000864               | 0.00372                | 154.1                        | 146.2                         | <b>1.05</b>  | <b>hsa-miR-374a</b> | Xq13.2               |

\*Intensities (expression levels) are reported as geometric means after quantiles normalization.

**Supplemental Table V.** Down-regulated microRNAs in 31 types of solid cancers (2532 cancer samples vs. 806 corresponding normal samples)

| Parametric<br>p-value  | FDR                    | Intensities<br>in Solid<br>Cancers | Intensities<br>in Normal<br>Tissues | Fold<br>Change | microRNA     | Chromosomal<br>location |
|------------------------|------------------------|------------------------------------|-------------------------------------|----------------|--------------|-------------------------|
| $< 1 \times 10^{-07}$  | $< 1 \times 10^{-07}$  | 275.7                              | 403                                 | <b>0.68</b>    | hsa-miR-203  | 14q32.33                |
| $< 1 \times 10^{-07}$  | $< 1 \times 10^{-07}$  | 714.9                              | 1015.1                              | <b>0.7</b>     | hsa-miR-145  | 5q32                    |
| 0.000003               | $2.23 \times 10^{-05}$ | 273.7                              | 349.6                               | <b>0.78</b>    | hsa-miR-205  | 1q32.2                  |
| $2.00 \times 10^{-07}$ | $1.80 \times 10^{-06}$ | 382.5                              | 471.2                               | <b>0.81</b>    | hsa-miR-206  | 6p12.2                  |
| $< 1 \times 10^{-07}$  | $< 1 \times 10^{-07}$  | 204                                | 247.9                               | <b>0.82</b>    | hsa-miR-33b  | 17p11.2                 |
| $3.70 \times 10^{-06}$ | $2.67 \times 10^{-05}$ | 419.9                              | 507.8                               | <b>0.83</b>    | hsa-miR-193a | 17q11.2                 |
| 0.000042               | 0.000249               | 175.1                              | 208.5                               | <b>0.84</b>    | hsa-miR-204  | 9q21.12                 |
| $< 1 \times 10^{-07}$  | $< 1 \times 10^{-07}$  | 173.9                              | 204.2                               | <b>0.85</b>    | hsa-miR-143  | 5q32                    |
| $1.00 \times 10^{-07}$ | 0.000001               | 220.5                              | 260.2                               | <b>0.85</b>    | hsa-miR-326  | 11q13.4                 |
| $< 1 \times 10^{-07}$  | $< 1 \times 10^{-07}$  | 150.2                              | 176.9                               | <b>0.85</b>    | hsa-miR-338  | 17q25.3                 |
| $< 1 \times 10^{-07}$  | $< 1 \times 10^{-07}$  | 164.8                              | 193.6                               | <b>0.85</b>    | hsa-miR-9    | 1q22.5q14.3,<br>15q26.1 |
| 0.000355               | 0.001789               | 190.6                              | 220.4                               | <b>0.86</b>    | hsa-miR-95   | 4p16.1                  |
| $7.40 \times 10^{-06}$ | $4.82 \times 10^{-05}$ | 225.6                              | 259.4                               | <b>0.87</b>    | hsa-miR-138  | 16q13.3p21.33           |
| 0.000435               | 0.002                  | 160.4                              | 183.8                               | <b>0.87</b>    | hsa-miR-183  | 7q32.2                  |
| $< 1 \times 10^{-07}$  | $< 1 \times 10^{-07}$  | 150.4                              | 172.9                               | <b>0.87</b>    | hsa-miR-202  | 10q26.3                 |
| $8.24 \times 10^{-05}$ | 0.000458               | 529.1                              | 603.1                               | <b>0.88</b>    | hsa-miR-128a | 2q21.3,3p22.3           |
| 0.000921               | 0.003905               | 617                                | 694.2                               | <b>0.89</b>    | hsa-miR-214  | 1q24.3                  |
| $< 1 \times 10^{-07}$  | $< 1 \times 10^{-07}$  | 139                                | 153.9                               | <b>0.9</b>     | hsa-miR-132  | 17p13.3                 |
| $< 1 \times 10^{-07}$  | $< 1 \times 10^{-07}$  | 140.7                              | 156.7                               | <b>0.9</b>     | hsa-miR-299  | 14q32.31                |
| $< 1 \times 10^{-07}$  | $< 1 \times 10^{-07}$  | 140.7                              | 154.8                               | <b>0.91</b>    | hsa-miR-129  | 7q32.1,11p11.2          |
| $2.00 \times 10^{-07}$ | $1.80 \times 10^{-06}$ | 139.6                              | 152.7                               | <b>0.91</b>    | hsa-miR-133a | 18q11.2,20q13.33        |
| $< 1 \times 10^{-07}$  | $< 1 \times 10^{-07}$  | 129.8                              | 141.1                               | <b>0.92</b>    | hsa-miR-139  | 11q13.4                 |
| $8.80 \times 10^{-06}$ | $5.46 \times 10^{-05}$ | 153.4                              | 165                                 | <b>0.93</b>    | hsa-miR-339  | 7p22.3                  |
| $4.50 \times 10^{-06}$ | $3.08 \times 10^{-05}$ | 140                                | 149.6                               | <b>0.94</b>    | hsa-miR-1    | 20q13.33,18q11.2        |
| $9.68 \times 10^{-05}$ | 0.000528               | 140.4                              | 149.6                               | <b>0.94</b>    | hsa-miR-133b | 6p12.2                  |
| $< 1 \times 10^{-07}$  | $< 1 \times 10^{-07}$  | 129.7                              | 137.8                               | <b>0.94</b>    | hsa-miR-323  | 14q32.31                |
| 0.000394               | 0.001946               | 144.7                              | 152.7                               | <b>0.95</b>    | hsa-miR-218  | 4p15.31,5q34            |
| 0.000193               | 0.00101                | 130.2                              | 133                                 | <b>0.98</b>    | hsa-miR-335  | 7q32.2                  |

\*Intensities (expression levels) are reported as geometric means after quantiles normalization.

**Supplemental Table VI.** Expression levels of tissue specific microRNAs in cancer and leukemia

| Name            | Cancer Specificity                                     | Expression              | IC   | Chromosomal location                                  |
|-----------------|--------------------------------------------------------|-------------------------|------|-------------------------------------------------------|
| hsa-miR-369-3p  | OVARIAN ADENOCARCINOMA                                 | 2737                    | 3.95 | 14:101531935-101532004                                |
| hsa-miR-325     | PANCREAS NON-FUNCTIONING ENDOCRINE CANCER / INSULINOMA | 1625 / 365              | 3.67 | X: 76225829-76225926                                  |
| hsa-miR-208     | CC / BCC / EPIDERMIS SCC                               | 256/ 244 / 418          | 3.36 | 14:22,927,645-22,927,715<br>14:22,957,036-22,957,112  |
| hsa-miR-190     | TPC / HEPATOBLASTOMA                                   | 211 / 220               | 3.04 | 15: 63116156-63116240                                 |
| hsa-miR-184     | AMoL / HEPATOBLASTOMA / TPC / MM                       | 448 / 324 / 214 / 171   | 3.01 | 15: 79502130-79502213                                 |
| hsa-miR-338-5p  | EPIDERMIS SCC / BCC / CC                               | 1928 / 808 / 472        | 2.70 | 17: 79099683-79099749                                 |
| hsa-miR-105     | HGSIL                                                  | 234                     | 2.57 | X:151,311,347-151,313,620                             |
| hsa-miR-376c    | LYMPHOMA CUTANEOUS / EPIDERMIS SCC / MM                | 1134 / 626 / 1223 / 525 | 2.50 | 14: 101506027-101506092                               |
| hsa-miR-302b    | EPIDERMIS SCC / LYMPHOMA CUTANEOUS                     | 336 / 110               | 2.48 | 4: 113569641-113569713                                |
| hsa-miR-299-5p  | HEPATOBLASTOMA / AMoL / TPC                            | 287 / 122 / 148         | 2.03 | 14: 101490131-101490193                               |
| hsa-miR-19a     | LYMPHOMA CUTANEOUS / CML                               | 388 /367                | 1.83 | 13: 92003145-92003226                                 |
| hsa-miR-200c    | AMoL / HEPATOBLASTOMA                                  | 4460 / 4138             | 1.99 | 12: 7072862-7072929                                   |
| hsa-miR-143     | AMoL / HEPATOBLASTOMA                                  | 1043 / 1098             | 1.94 | 5: 148808481-148808586                                |
| hsa-miR-211     | EPIDERMIS SCC / NSCLC                                  | 129 / 89                | 1.86 | 15: 31357235-31357344                                 |
| hsa-miR-374a    | BL SPORADIC / CML / APL                                | 619 / 169 / 212         | 1.69 | X: 73507121-73507192                                  |
| hsa-miR-339-5p  | BL ENDEMIC / BL SPORADIC                               | 616 / 738               | 1.62 | 7: 1062569-1062662                                    |
| hsa-miR-148a    | LYMPHOMA CUTANEOUS                                     | 1161                    | 1.64 | 7: 25989539-25989606                                  |
| hsa-miR-370     | BREAST, DUCTAL, LOBULAR, MALE CARCINOMA                | 157, 227, 239           | 1.69 | 14: 101377476-101377550                               |
| hsa-miR-199a-5p | HEPATOBLASTOMA                                         | 1122                    | 1.52 | 19:10,789,102-10,789,172<br>1:170,380,298-170,380,407 |
| hsa-miR-215     | KIDNEY CARCINOMA / HEPATOBLASTOMA                      | 7247 /2461              | 1.45 | 1: 220291195-220291304                                |
| hsa-miR-19b     | CML                                                    | 232                     | 1.33 | 13:90,801,447-90,801,533<br>X:133,131,367-133,131,462 |
| hsa-miR-148b    | LYMPHOMA CUTANEOUS                                     | 657                     | 1.39 | 12: 54731000-54731098                                 |
| hsa-miR-18a     | AMoL / FOLLICULAR ADENOMA                              | 166 / 76                | 1.38 | 13: 92003005-92003075                                 |
| hsa-miR-202     | AMoL/ HEPATOBLASTOMA                                   | 362 / 287               | 1.32 | 10: 135061015-135061124                               |
| hsa-miR-205     | AMoL / HEPATOBLASTOMA / LUNG SCC                       | 2029 / 2275 / 2665      | 1.31 | 1: 209605478-209605587                                |

**Legend:** Burkitt's Lymphoma: BL; Thyroid Papillary Cancer: TPC; Multiple Myeloma: MM; Squamous Cell Carcinoma: SCC; Basal Cell Carcinoma: BCC; Chronic Myelogenous Leukemia: CML; Acute Promyelocytic Leukemia: APL; High Grade Squamous Intraepithelial Lesion: HGSIL; Non-Small Cell Lung Cancer: NSCLC; Acute Monocytic Leukemia: AmoL; Cervix Carcinoma: CC.

**Supplemental Table VII.** Array CGH datasets

| <b>GEO datasets</b> | <b># of samples</b> | <b>Cancer type</b>                                                                                                                              | <b>Platform</b>    |
|---------------------|---------------------|-------------------------------------------------------------------------------------------------------------------------------------------------|--------------------|
| GSE4659             | 32                  | AML                                                                                                                                             | GPL2873            |
| GSE6472             | 6                   | Nasopharyngeal carcinoma                                                                                                                        | GPL2879            |
| GSE7077             | 4                   | Osteosarcoma                                                                                                                                    | GPL2879            |
| GSE7344             | 16                  | Glioma                                                                                                                                          | GPL2873            |
| GSE7482             | 25                  | ACC                                                                                                                                             | GPL2879            |
| GSE7615             | 298                 | Pancreas, glioblastoma, T-ALL, melanoma, colon                                                                                                  | GPL2879<br>GPL4091 |
| GSE7822             | 14                  | Melanoma                                                                                                                                        | GPL2879            |
| GSE8398             | 25                  | Ewing Sarcoma                                                                                                                                   | GPL2879            |
| GSE8804             | 13                  | Myelodysplasia                                                                                                                                  | GPL2879            |
| GSE8918             | 87                  | Follicular Lymphoma, CLL, Mantle Cell Lymphoma, Nodal Marginal Zone Lymphoma, Lymphoplasmacytic Lymphoma, Splenic Marginal Zone Lymphoma , MALT | GPL2879            |
| GSE9015             | 7                   | Breast                                                                                                                                          | GPL4091            |
| GSE9654             | 10                  | Osteosarcoma                                                                                                                                    | GPL2879            |
| SMD                 | 207                 | Lung, Pancreas, Breast, Melanoma, Fibrous Histiocytoma                                                                                          | Stanford           |

- GPL2873 Agilent- Human Genome CGH Microarray 44A G4410A
- GPL2879 Agilent- Human Genome CGH Microarray 44B G4410B
- GPL4091 Agilent- Human Genome CGH Microarray 244A G4411B

**Supplemental Table VIII.** miRNA families amplified in cancer

| miRNA family                           | p-value                | FDR   | Amplified (p<0.05)                                    | Family members |
|----------------------------------------|------------------------|-------|-------------------------------------------------------|----------------|
| <b><i>hsa-miR-550</i></b>              | 1.25x10 <sup>-09</sup> | 0.006 | <i>hsa-miR-550-2;hsa-miR-550-1</i>                    | 2              |
| <b><i>hsa-miR-9</i></b>                | 7.00x10 <sup>-11</sup> | 0.012 | <i>hsa-miR-9-1;hsa-miR-9-2;</i><br><i>hsa-miR-9-3</i> | 3              |
| <b><i>hsa-miR-133</i></b>              | 2.50x10 <sup>-09</sup> | 0.060 | <i>hsa-miR-133a-2;hsa-miR-133b</i>                    | 3              |
| <b><i>hsa-miR-153</i></b>              | 5.00x10 <sup>-07</sup> | 0.062 | <i>hsa-miR-153-1;hsa-miR-153-2</i>                    | 2              |
| <b><i>hsa-miR-548d</i></b>             | 1.40x10 <sup>-06</sup> | 0.073 | <i>hsa-miR-548d-1;hsa-miR-548d-2</i>                  | 2              |
| <b><i>hsa-miR-1/206</i></b>            | 7.55x10 <sup>-10</sup> | 0.114 | <i>hsa-miR-1-1;hsa-miR-206</i>                        | 4              |
| <b><i>hsa-miR-146</i></b>              | 1.97x10 <sup>-05</sup> | 0.116 | <i>hsa-miR-146a</i>                                   | 2              |
| <b><i>hsa-miR-148/152</i></b>          | 2.00x10 <sup>-07</sup> | 0.133 | <i>hsa-miR-152;hsa-miR-148a</i>                       | 3              |
| <b><i>hsa-miR-196</i></b>              | 5.54x10 <sup>-07</sup> | 0.150 | <i>hsa-miR-196b;hsa-miR-196a-2</i>                    | 3              |
| <b><i>hsa-miR-17/20/93/106/519</i></b> | 3.70x10 <sup>-06</sup> | 0.194 | <i>hsa-miR-106b</i>                                   | 3              |
| <b><i>hsa-miR-30-5p</i></b>            | 1.06x10 <sup>-05</sup> | 0.226 | <i>hsa-miR-30d</i>                                    | 3              |
| <b><i>hsa-miR-192/215</i></b>          | 4.95x10 <sup>-05</sup> | 0.239 | <i>hsa-miR-192</i>                                    | 2              |
| <b><i>hsa-miR-194</i></b>              | 4.95x10 <sup>-05</sup> | 0.239 | <i>hsa-miR-194-2</i>                                  | 2              |
| <b><i>hsa-miR-551</i></b>              | 4.97x10 <sup>-05</sup> | 0.239 | <i>hsa-miR-551b</i>                                   | 2              |

\* FDR < 0.3 (i.e. less than 30% of the identified miRNA families were expected to be false positives)

**Supplemental Table IX.** miRNA families deleted in cancer

| miRNA family                    | p-value                | FDR   | Deleted (p<0.05)                   | Family members |
|---------------------------------|------------------------|-------|------------------------------------|----------------|
| <b><i>hsa-miR-204/211</i></b>   | 6.25x10 <sup>-10</sup> | 0.003 | <i>hsa-miR-211;hsa-miR-204</i>     | 2              |
| <b><i>hsa-miR-103/107</i></b>   | 2.45x10 <sup>-09</sup> | 0.064 | <i>hsa-miR-107;hsa-miR-103-2</i>   | 3              |
| <b><i>hsa-miR-380-5p</i></b>    | 2.85x10 <sup>-06</sup> | 0.109 | <i>hsa-miR-563</i>                 | 2              |
| <b><i>hsa-miR-128</i></b>       | 3.25x10 <sup>-06</sup> | 0.113 | <i>hsa-miR-128a</i>                | 2              |
| <b><i>hsa-miR-141/200a</i></b>  | 1.52x10 <sup>-05</sup> | 0.170 | <i>hsa-miR-200a</i>                | 2              |
| <b><i>hsa-miR-200bc/429</i></b> | 1.52x10 <sup>-05</sup> | 0.170 | <i>hsa-miR-429</i>                 | 2              |
| <b><i>hsa-miR-125/351</i></b>   | 3.50x10 <sup>-07</sup> | 0.189 | <i>hsa-miR-125b-1;hsa-miR-125a</i> | 3              |
| <b><i>hsa-miR-218</i></b>       | 2.41x10 <sup>-05</sup> | 0.193 | <i>hsa-miR-218-1</i>               | 2              |
| <b><i>hsa-miR-101</i></b>       | 2.70x10 <sup>-05</sup> | 0.230 | <i>hsa-miR-101-1;hsa-miR-101-2</i> | 2              |
| <b><i>hsa-miR-99/100</i></b>    | 4.38x10 <sup>-05</sup> | 0.241 | <i>hsa-miR-99b</i>                 | 2              |
| <b><i>hsa-miR-23</i></b>        | 8.80x10 <sup>-05</sup> | 0.290 | <i>hsa-miR-23b;hsa-miR-23a</i>     | 2              |
| <b><i>hsa-miR-24</i></b>        | 8.80x10 <sup>-05</sup> | 0.290 | <i>hsa-miR-24-1;hsa-miR-24-2</i>   | 2              |
| <b><i>hsa-miR-27</i></b>        | 8.80x10 <sup>-05</sup> | 0.290 | <i>hsa-miR-27b;hsa-miR-27a</i>     | 2              |

\* FDR < 0.3 (i.e. less than 30% of the identified miRNA families were expected to be false positives)

**Supplemental Table X.** Deregulated miRNAs in leukemia from Mir155 transgenic mice.

| Parametric p-value     | FDR                    | Intensity in hsa-miR-155 Leukemia | Intensity in Wt | Fold Change  | miRNA               |
|------------------------|------------------------|-----------------------------------|-----------------|--------------|---------------------|
| 1.00x10 <sup>-06</sup> | 2.31x10 <sup>-05</sup> | 832.1                             | 10.08           | <b>82.57</b> | <b>hsa-miR-224</b>  |
| 4.20x10 <sup>-06</sup> | 5.67x10 <sup>-05</sup> | 3426.09                           | 132.36          | <b>25.89</b> | <b>hsa-miR-9</b>    |
| 1.00x10 <sup>-07</sup> | 7.20x10 <sup>-06</sup> | 21760.18                          | 1005.44         | <b>21.64</b> | <b>hsa-miR-217</b>  |
| 5.70x10 <sup>-06</sup> | 7.39x10 <sup>-05</sup> | 3387.97                           | 219.75          | <b>15.42</b> | <b>hsa-miR-131</b>  |
| 1.00x10 <sup>-07</sup> | 7.20x10 <sup>-06</sup> | 5334.39                           | 375.03          | <b>14.22</b> | <b>hsa-miR-128b</b> |
| 1.00x10 <sup>-07</sup> | 7.20x10 <sup>-06</sup> | 31460.89                          | 2922.63         | <b>10.76</b> | <b>hsa-miR-181b</b> |
| 2.00x10 <sup>-07</sup> | 7.20x10 <sup>-06</sup> | 17040.98                          | 1615.73         | <b>10.55</b> | <b>hsa-miR-181c</b> |
| 2.00x10 <sup>-07</sup> | 7.20x10 <sup>-06</sup> | 18356.22                          | 1976.64         | <b>9.29</b>  | <b>hsa-miR-128a</b> |
| 1.28x10 <sup>-05</sup> | 0.000148               | 759.87                            | 2695.34         | <b>0.28</b>  | <b>hsa-miR-140</b>  |
| 0.000659               | 0.003556               | 228.42                            | 874.66          | <b>0.26</b>  | <b>hsa-miR-135a</b> |
| 3.69x10 <sup>-05</sup> | 0.000332               | 8491.07                           | 34327.47        | <b>0.25</b>  | <b>hsa-miR-26a</b>  |
| 0.000128               | 0.000984               | 528.06                            | 2433.76         | <b>0.22</b>  | <b>hsa-miR-10a</b>  |
| 3.50x10 <sup>-06</sup> | 5.55x10 <sup>-05</sup> | 590.74                            | 2779.66         | <b>0.21</b>  | <b>hsa-miR-425</b>  |
| 0.000193               | 0.001351               | 514.05                            | 2467.2          | <b>0.21</b>  | <b>hsa-miR-340</b>  |
| 0.000474               | 0.002742               | 81.06                             | 403.52          | <b>0.2</b>   | <b>hsa-miR-24</b>   |
| 2.00x10 <sup>-06</sup> | 3.78x10 <sup>-05</sup> | 656.68                            | 3304.56         | <b>0.2</b>   | <b>hsa-miR-140</b>  |
| 0.000579               | 0.003178               | 30.24                             | 196.77          | <b>0.15</b>  | <b>hsa-miR-218</b>  |
| 2.55x10 <sup>-05</sup> | 0.000243               | 1006.31                           | 6657.6          | <b>0.15</b>  | <b>hsa-miR-29b</b>  |
| 6.00x10 <sup>-07</sup> | 1.62x10 <sup>-05</sup> | 1007.33                           | 7465.65         | <b>0.13</b>  | <b>hsa-miR-29a</b>  |
| 2.54x10 <sup>-05</sup> | 0.000243               | 357.49                            | 3183.78         | <b>0.11</b>  | <b>hsa-miR-29c</b>  |
| < 1x10 <sup>-07</sup>  | < 1x10 <sup>-07</sup>  | 2176.08                           | 37081.81        | <b>0.06</b>  | <b>hsa-miR-146</b>  |
| 2.70x10 <sup>-06</sup> | 4.60x10 <sup>-05</sup> | 3339.45                           | 59257.53        | <b>0.06</b>  | <b>hsa-miR-150</b>  |

## Legends to Supplemental Figures

**Supplemental Figure 1.** miRNA specificity in 50 normal tissues grouped by system. The tissue specificity was calculated by using the information content (IC), value expressed on y-axis; each color represents a system. The hsa-miR-302 cluster is the most representative for embryonic tissues.

**Supplemental Figure 2.** The miRNA specificity during ES cell differentiation. miRNA specificity in 7 different types of embryonic tissues (embryonic stem cells, 7 days and 14 days embryonic bodies, trophoblasts, endoderm, induced pluripotent stem cells (iPS), spontaneously differentiating monolayers). The specificity was calculated by using the information content (IC).

**Supplemental Figure 3.** The node degree distribution of the normal tissues and solid cancers miRNA networks. The figure illustrates the apparent scale-freeness of the graphs for normal tissues (A) and solid cancers (B). The blue curve represents the absolute frequency of node degrees and the green curve the inverse cumulative frequency (Supplementary data excel file). The exponential decrease of both curves shows that there are a lot more poorly connected nodes than highly connected (hubs). Both miRNA graphs thus present a scale free behavior.

**Supplemental Figure 4.** miRNA specificity in 31 solid tumors and 20 leukemia types. The specificity was calculated by using the information content (IC), value expressed on y-axis; each color represents a cancer type.

**Supplemental Figure 5.** Functions repressed in cancer by up-regulated miRNAs. KEGG analysis by ClueGO (Bindea et al. 2009) of terms ( $p\text{-value} < 1 \times 10^{-3}$ ) targeted by up-regulated miRNAs (listed in Table I and Supplemental Tables IV). Target genes selection was performed with DIANA-miRpath, microT-V4.0 (Papadopoulos et al. 2009). The union of the target mRNAs with a score above 3 was used as an input to ClueGO. Right-sided hyper-geometric test yielded

the enrichment for GO-terms. Benjamini-Hochberg correction for multiple testing controlled the p-values. GO term fusion was applied for redundancy reduction.

**Supplemental Figure 6.** Functions activated in cancer by down-regulated miRNAs. KEGG analysis by ClueGO (Bindea, Mlecnik, Hackl, Charoentong, Tosolini, Kirilovsky, Fridman, Pages, Trajanoski and Galon 2009) of terms (p-value  $<1 \times 10^{-3}$ ) targeted by down-regulated miRNAs (listed in Table I and Supplemental Tables V). Target genes selection was performed with DIANA-miRpath, microT-V4.0 (Papadopoulos, Alexiou, Maragkakis, Reczko and Hatzigeorgiou 2009). The union of the target mRNAs with a score above 3 was used as an input to ClueGO. Right-sided hyper-geometric test yielded the enrichment for GO-terms. Benjamini-Hochberg correction for multiple testing controlled the p-values. GO term fusion was applied for redundancy reduction.

**Supplemental Figure 7.** Functions controlled in lung adenocarcinoma by miRNAs from disjointed minor clusters. The colored groups are assigned the name of the most prominent GO group. The chart presents the specific terms and information related to the miRNA targets differentially expressed in cancer. The bars represent the number of the genes from the analyzed cluster found to be associated with the term, and the label displayed on the bars is the percentage of found genes compared to all the genes associated with the term. Term significance information is included in the chart.

**Supplemental Figure 8.** MicroRNA genetic network in colon adenocarcinoma (245 samples, 10 subnets). The network was inferred for all expressed and varying miRNAs, without preselecting for differential expression. Standard Banjo parameters were adopted with a q6 discretization policy. The consensus graph depicted here was obtained from the best 100 nets (after searching through  $>1 \times 10^{10}$  networks). MCL graph-based clustering algorithm was applied to clusters extraction (miRNAs with highly related expression pattern have edges of the same color); thus, different clusters in the network are linked by different color edges. yEd graph editor

(yFiles software, Tübingen, Germany) was employed for graphs visualization. See text for further discussion.

**Supplemental Figure 9.** MicroRNA genetic network in breast cancer (159 samples, 14 subnets). Same procedure described in legend of Supplemental Figure 6.

**Supplemental Figure 10.** MicroRNA genetic network in prostate cancer (170 samples and 5 subnets). Same procedure described in legend of Supplemental Figure 6.

**Supplemental Figure 1.** miRNA specificity in 50 normal tissues grouped by system (information content).

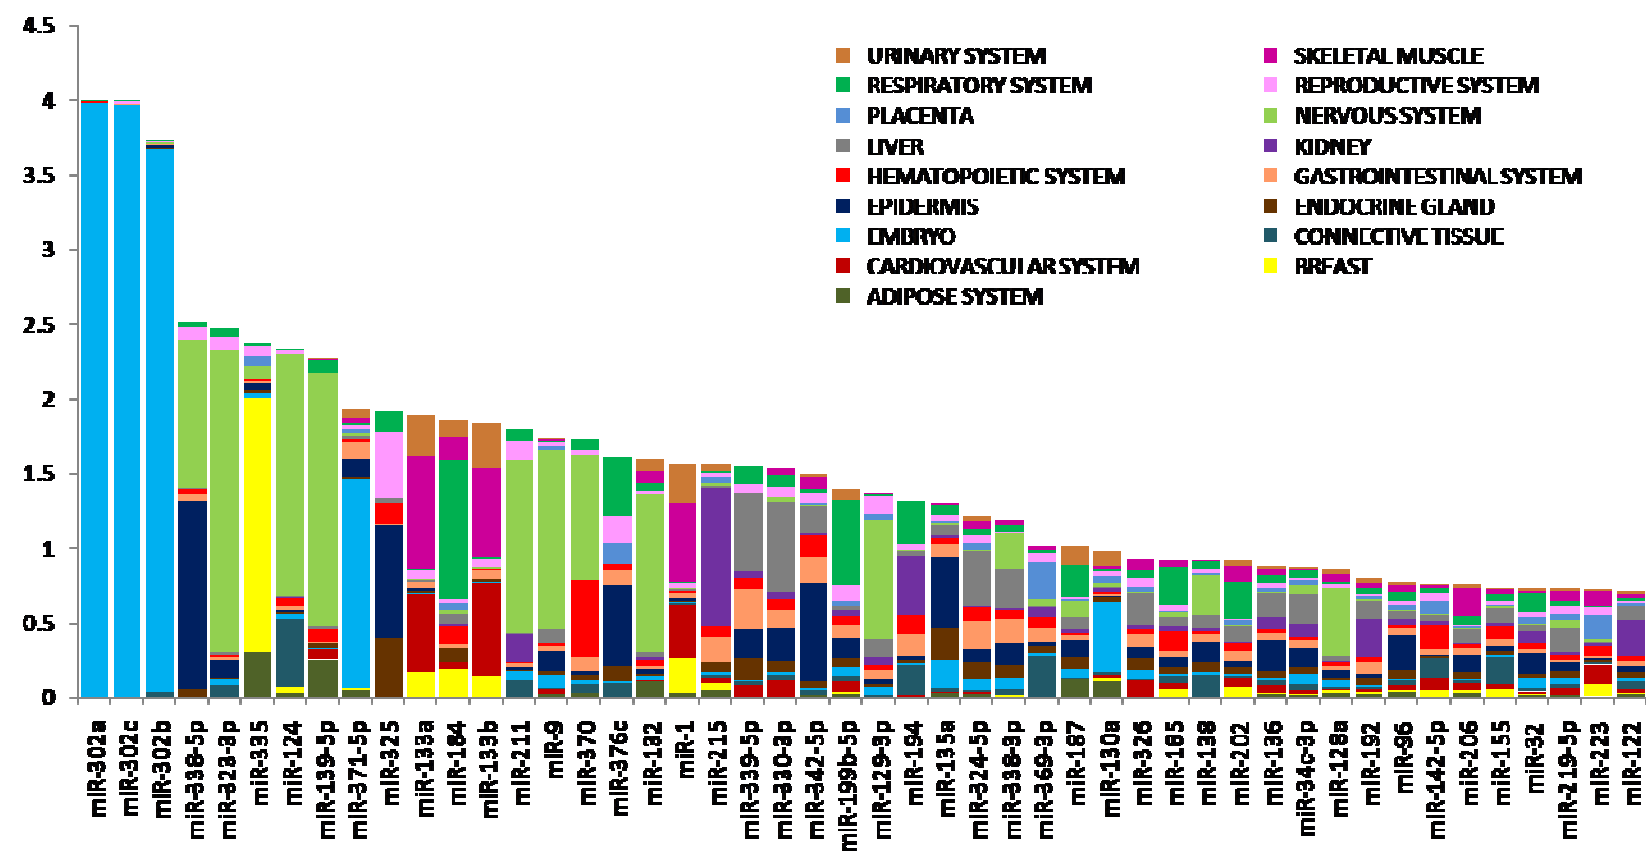

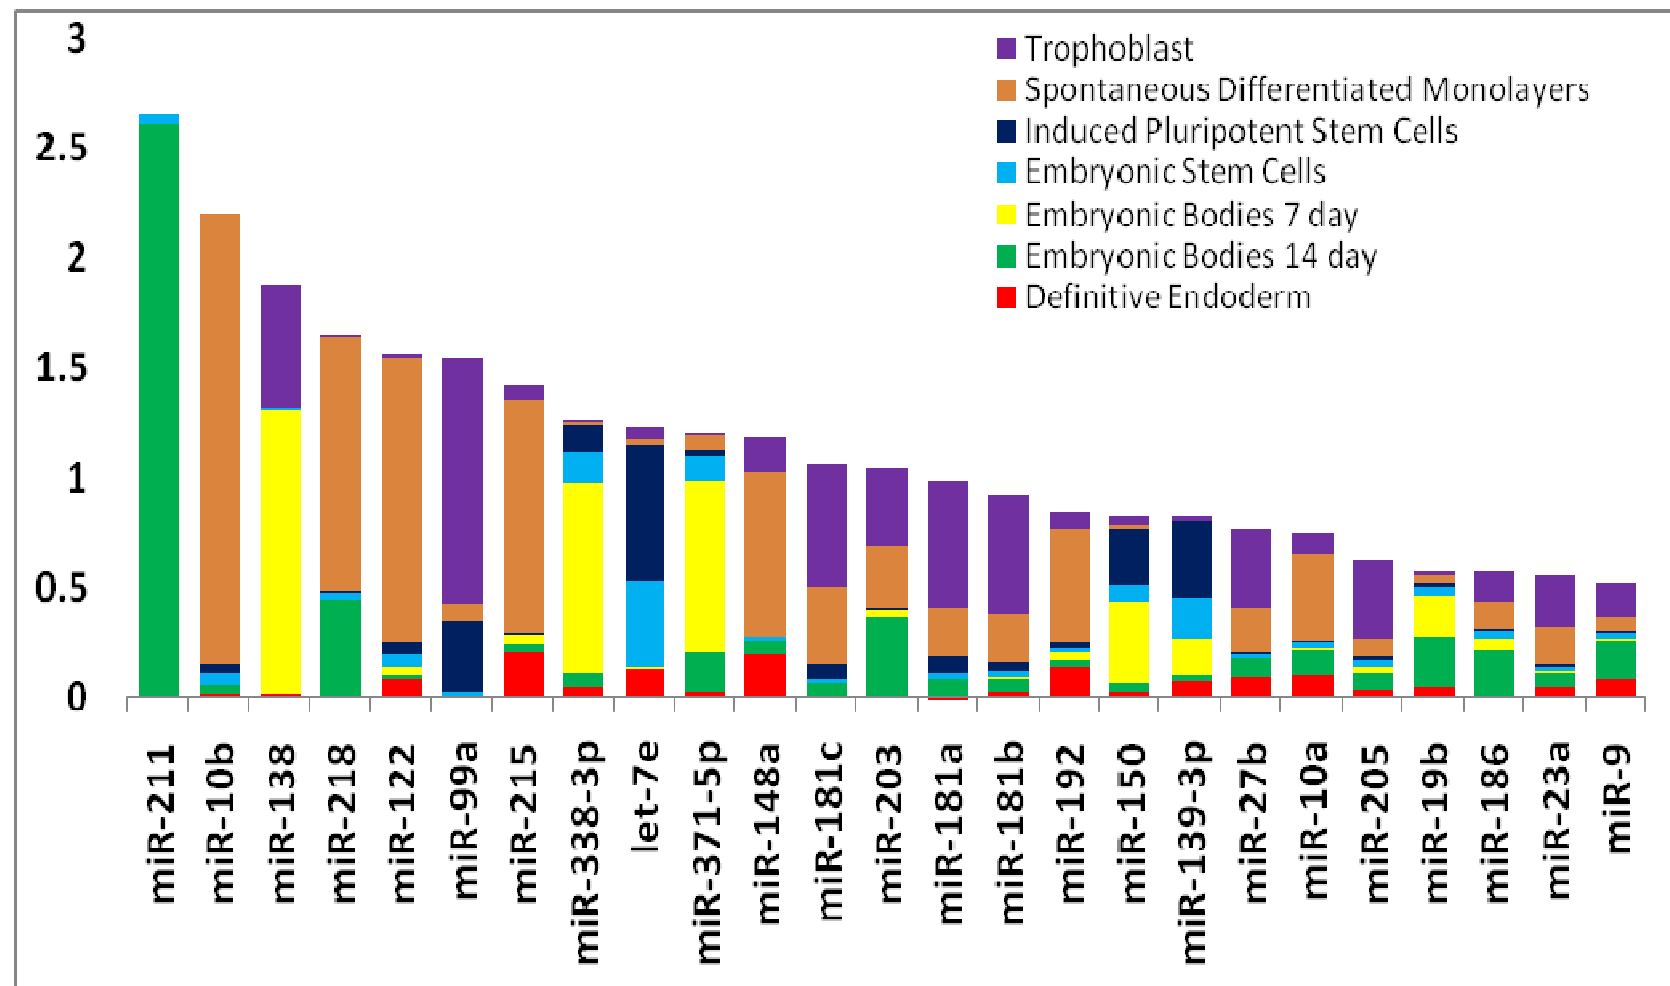

Supplemental Figure 2

**Supplemental Figure 3.** The node degree distribution of the normal tissues and solid cancers miRNA networks.

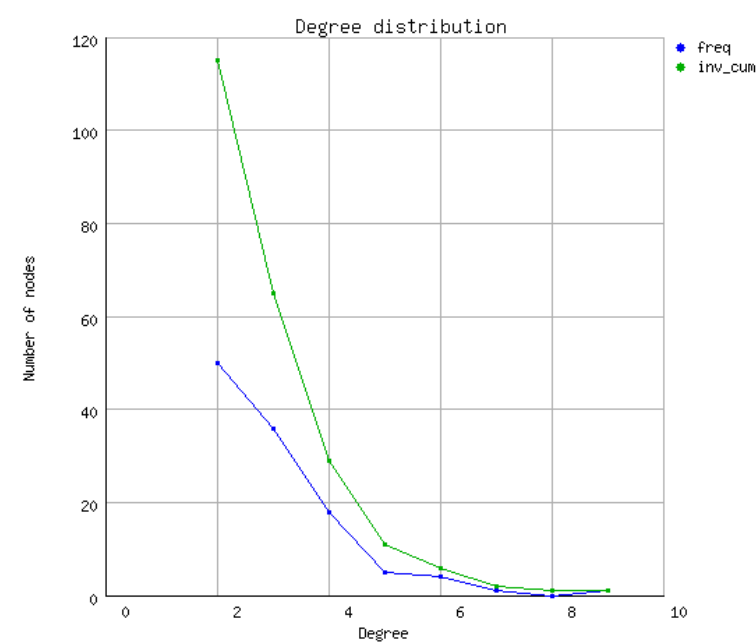

A

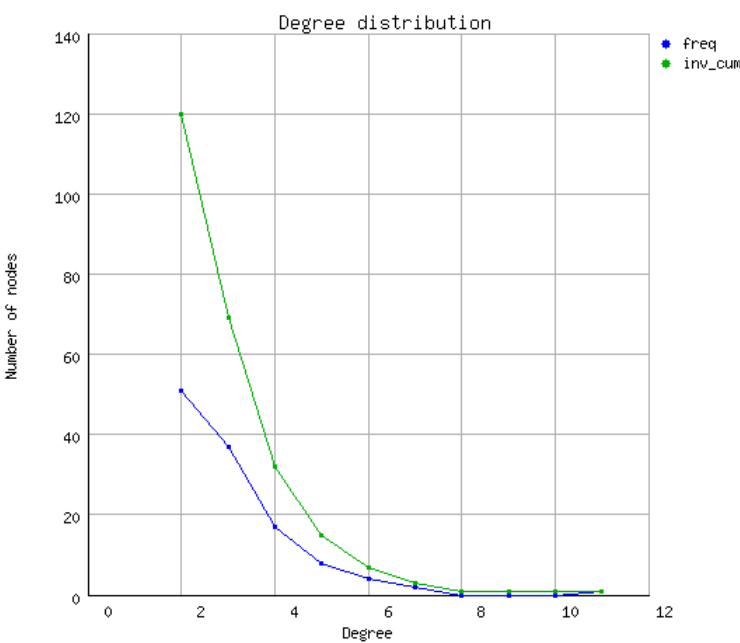

B

**Supplemental Figure 4.** miRNA specificity in tumors and leukemia (information content).

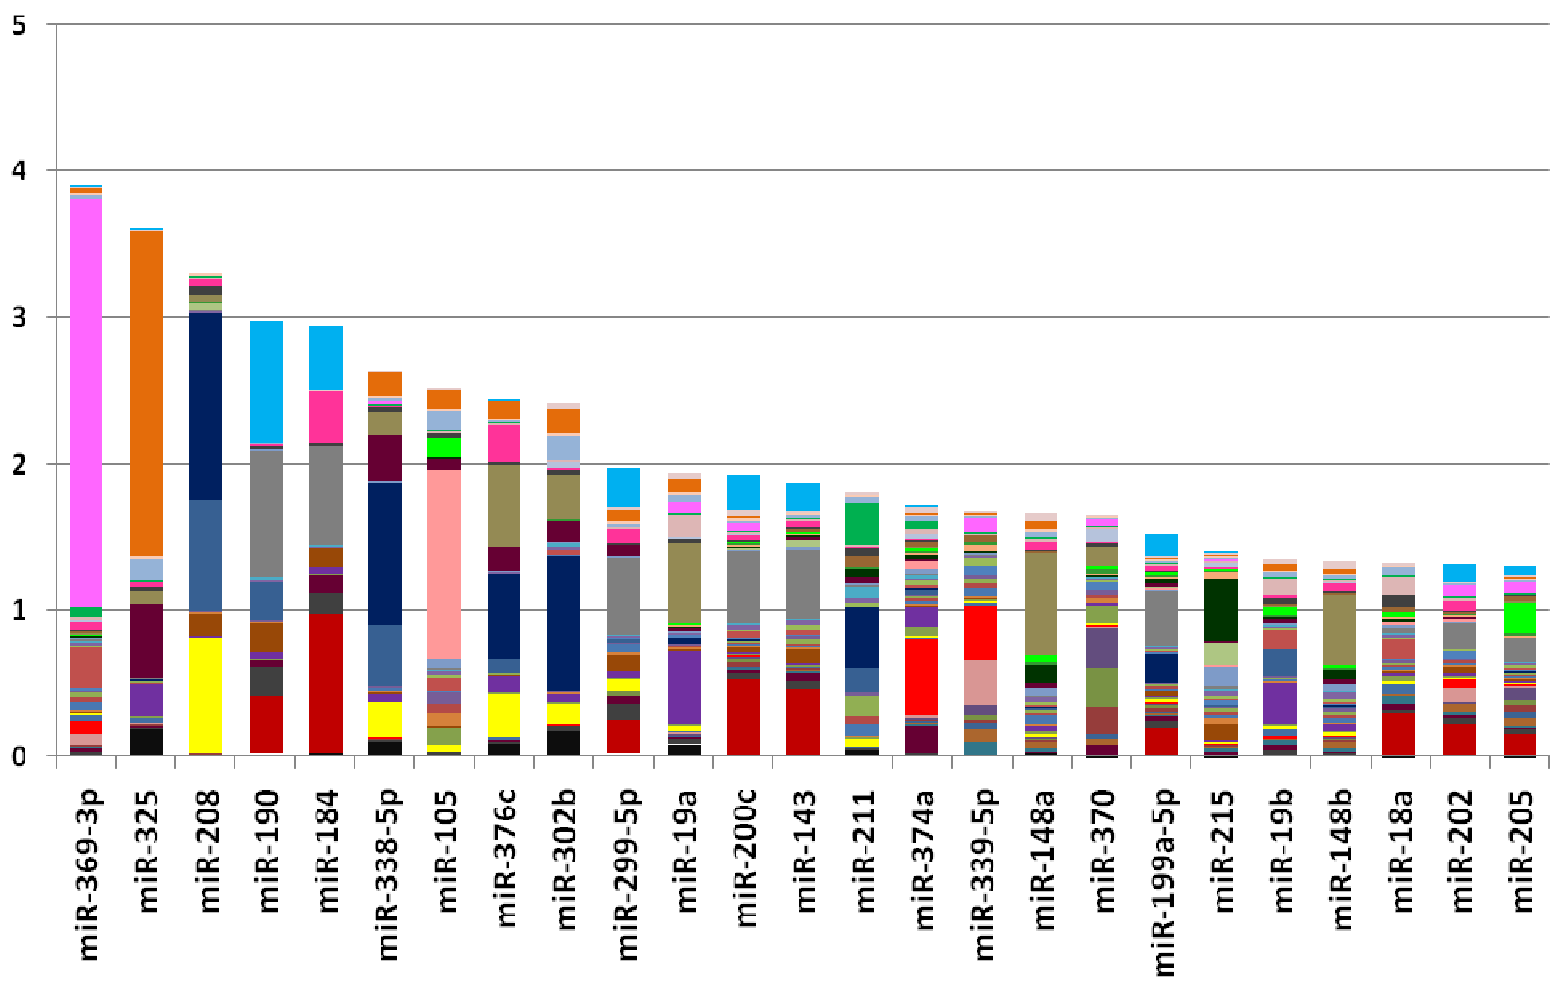

■ 1: ACUTE LYMPHOBLASTIC LEUKEMIA  
■ 4: ACUTE PROMYELOCYTIC LEUKEMIA  
■ 7: BLADDER TRANSITIONAL CELL CARCINOMA  
■ 10: BREAST MALE CARCINOMA  
■ 13: CERVIX ADENOCARCINOMA  
■ 16: CHRONIC MYELOGENOUS LEUKEMIA  
■ 19: DLBCL ANABLASTIC  
■ 22: DLBCLnos  
■ 25: ESOPHAGUS ADENOCARCINOMA  
■ 28: GASTRIC CANCER  
■ 31: HEPATOCELLULAR CARCINOMA  
■ 34: INSULINOMA  
■ 37: LUNG ADENOCARCINOMA  
■ 40: MANTLE CELL LYMPHOMA  
■ 43: MYELODYSPLASTICSYNDROMES  
■ 46: OVARIAN ADENOCARCINOMA  
■ 49: PANCREAS NONFUNCTIONING ENDOCRINE CANCER

■ 2: ACUTE MONOCYTIC LEUKEMIA  
■ 5: ANAPLASTIC LARGE CELL LYMPHOMA  
■ 8: BREAST DUCTAL CARCINOMA  
■ 11: BURKITT'S LYMPHOMA ENDEMIC  
■ 14: CERVIX CARCINOMA  
■ 17: COLON ADENOMA  
■ 20: DLBCL CENTROBLASTIC  
■ 23: EPIDERMIS BASAL CELL CARCINOMA  
■ 26: FOLLICULAR ADENOMA  
■ 29: GLIOMA  
■ 32: HGSIL  
■ 35: KIDNEY CARCINOMA  
■ 38: LUNG SQUAMOUS CELL CARCINOMA  
■ 41: MELANOMA  
■ 44: NEUROBLASTOMA  
■ 47: OVARIAN EPITHELIAL CARCINOMA  
■ 50: PROSTATE ADENOCARCINOMA

■ 3: ACUTE MYELOID LEUKEMIA  
■ 6: ANGIOIMMUNOBLASTIC T CELL LYMPHOMA  
■ 9: BREAST LOBULAR CARCINOMA  
■ 12: BURKITT'S LYMPHOMA SPORADIC  
■ 15: CHRONIC LYMPHOCYTIC LEUKEMIA  
■ 18: COLORECTAL ADENOCARCINOMA  
■ 21: DLBCL IMMUNOBLASTIC  
■ 24: EPIDERMIS SQUAMOUS CELL CARCINOMA  
■ 27: FOLLICULAR LYMPHOMA  
■ 30: HEPATOBLASTOMA  
■ 33: HODGKIN LYMPHOMA  
■ 36: LIVER CHOLANGIOCELLULAR CARCINOMA  
■ 39: LYMPHOMA CUTANEOUS  
■ 42: MULTIPLE MYELOMA  
■ 45: NSCLC  
■ 48: PANCREAS CARCINOMA  
■ 51: THYROID PAPILLARY CANCER

**Supplemental Figure 5.** Functions repressed in cancer by up-regulated miRNAs.

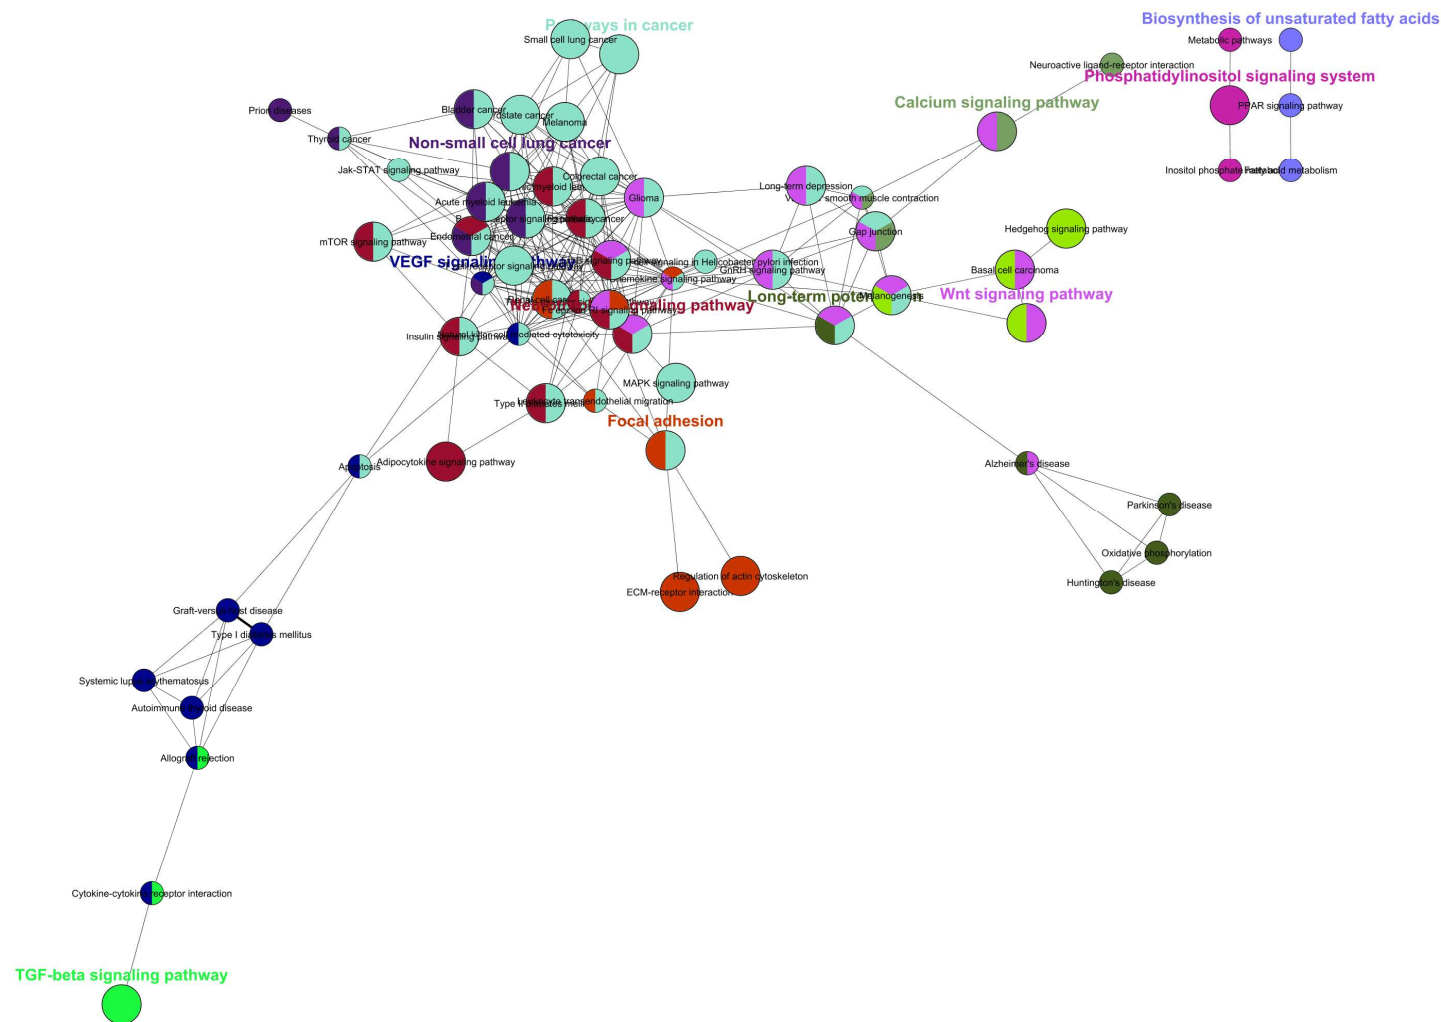

**Supplemental Figure 6.** Functions activated in cancer by down-regulated miRNAs.

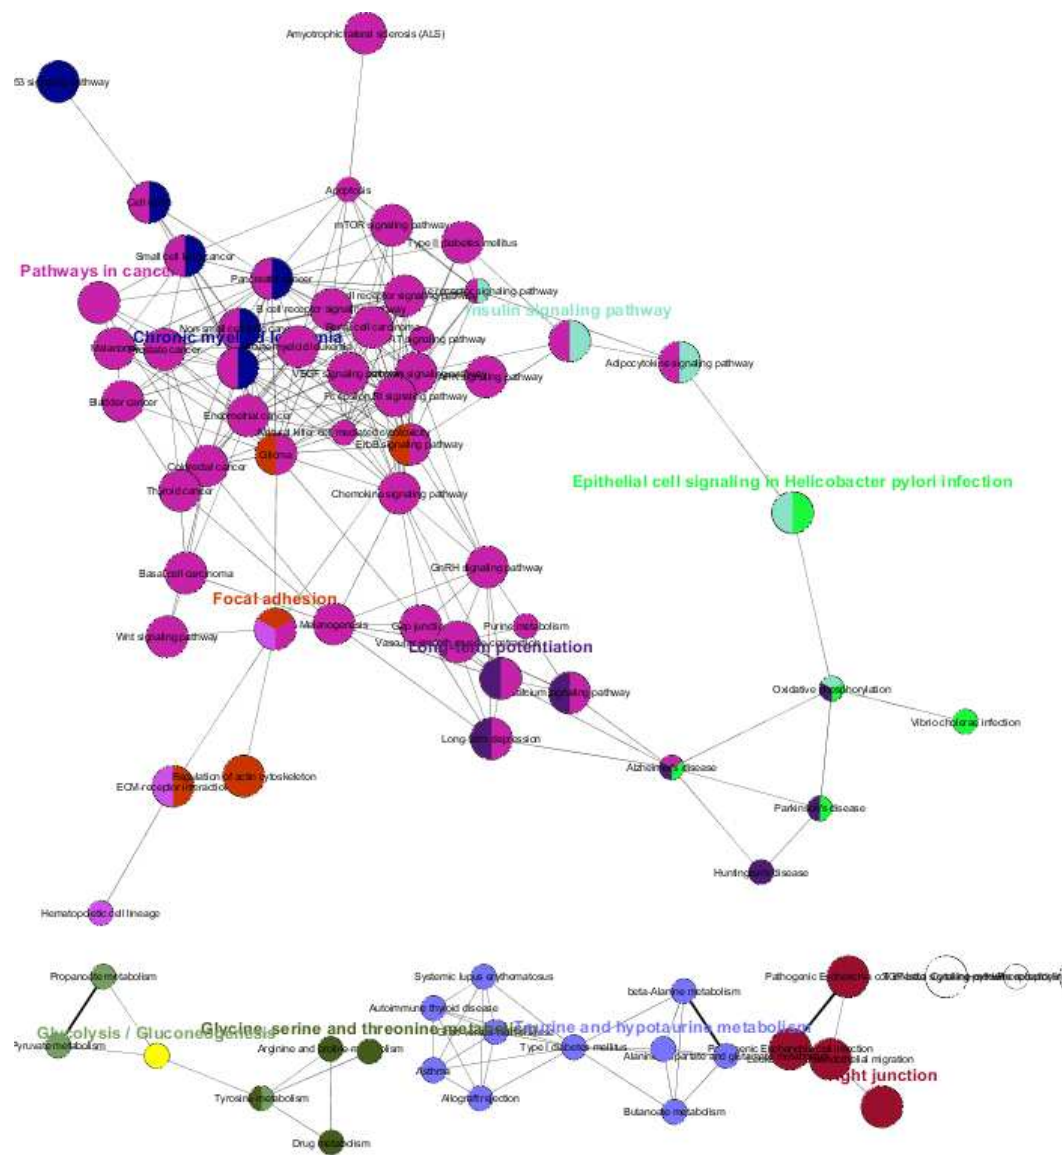

**Supplemental Figure 7.** Functions controlled in lung adenocarcinoma by miRNAs from disjointed minor clusters.

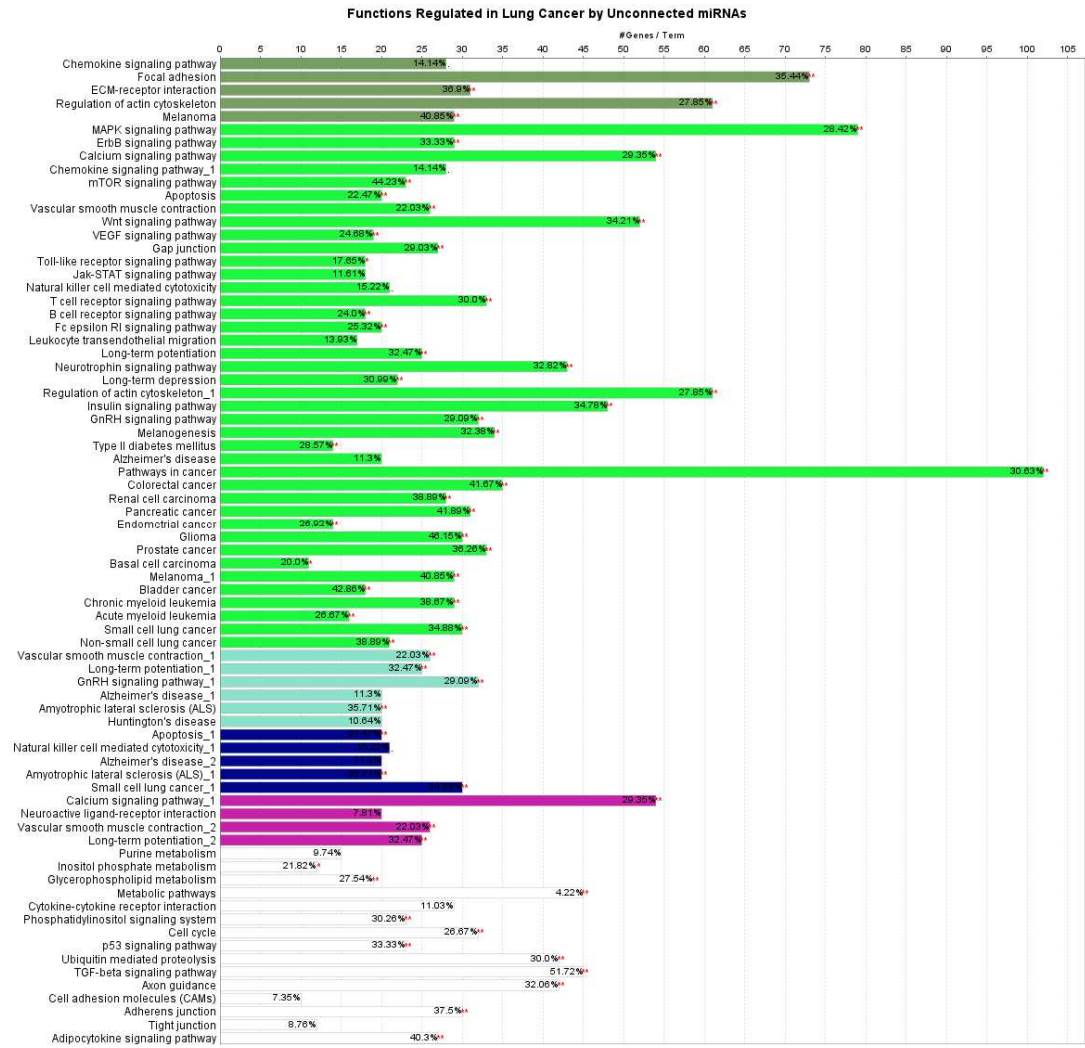

**Supplemental Figure 8.** MicroRNA genetic network in colon adenocarcinoma.

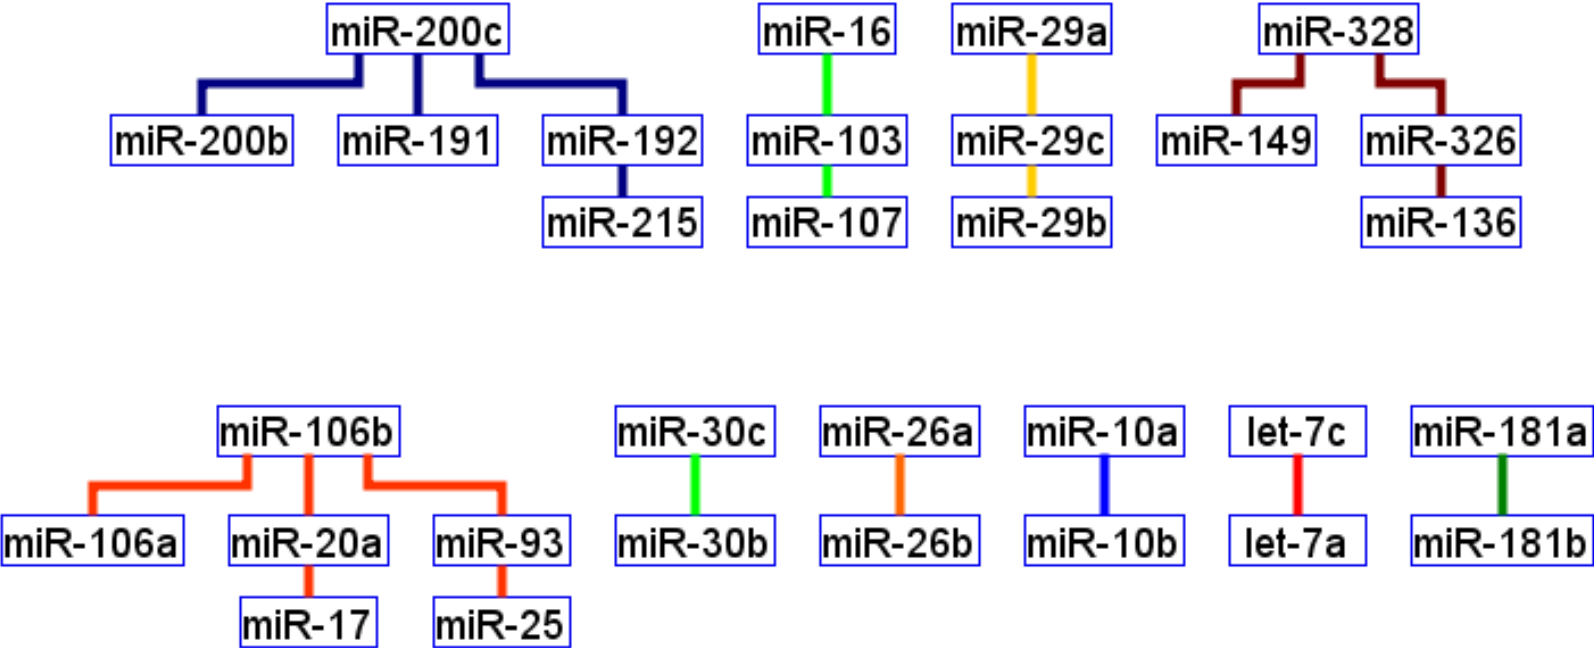

**Supplemental Figure 9.** MicroRNA genetic network in breast cancer.

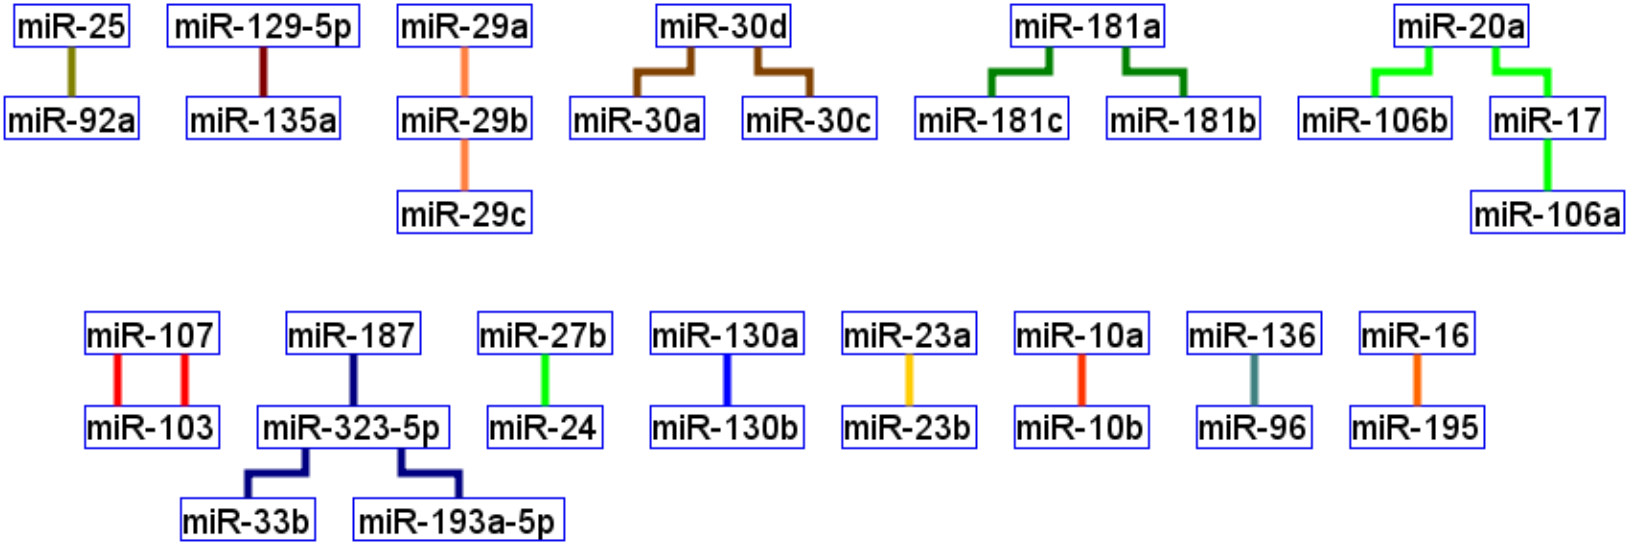

**Supplemental Figure 10.** MicroRNA genetic network in prostate cancer.

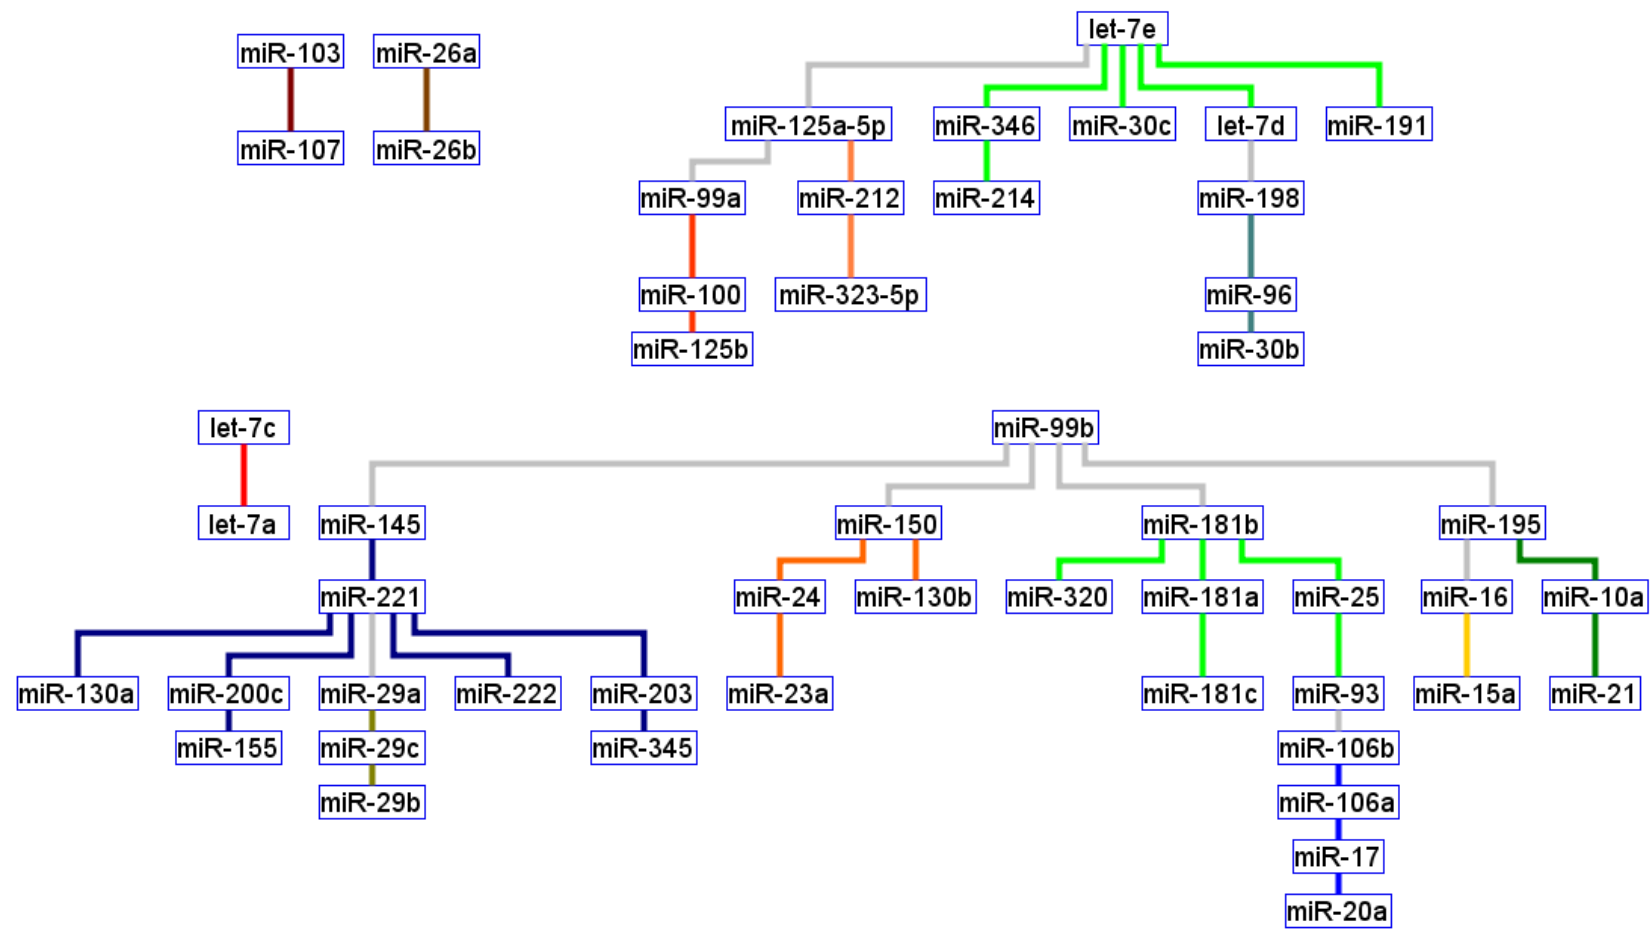

## Supplemental References

- Ambros, S., Prueitt, R.L., Yi, M., Hudson, R.S., Howe, T.M., Petrocca, F., Wallace, T.A., Liu, C.G., Volinia, S., Calin, G.A. et al. 2008. Genomic profiling of microRNA and messenger RNA reveals deregulated microRNA expression in prostate cancer. *Cancer research* **68**: 6162-6170.
- Baffa, R., Fassan, M., Volinia, S., O'Hara, B., Liu, C.G., Palazzo, J.P., Gardiman, M., Rugge, M., Gomella, L.G., Croce, C.M. et al. 2009. MicroRNA expression profiling of human metastatic cancers identifies cancer gene targets. *The Journal of pathology* **219**: 214-221.
- Bindea, G., Mlecnik, B., Hackl, H., Charoentong, P., Tosolini, M., Kirilovsky, A., Fridman, W.H., Pages, F., Trajanoski, Z., and Galon, J. 2009. ClueGO: a Cytoscape plug-in to decipher functionally grouped gene ontology and pathway annotation networks. *Bioinformatics (Oxford, England)* **25**: 1091-1093.
- Bloomston, M., Frankel, W.L., Petrocca, F., Volinia, S., Alder, H., Hagan, J.P., Liu, C.G., Bhatt, D., Taccioli, C., and Croce, C.M. 2007. MicroRNA expression patterns to differentiate pancreatic adenocarcinoma from normal pancreas and chronic pancreatitis. *Jama* **297**: 1901-1908.
- Budhu, A., Jia, H.L., Forgues, M., Liu, C.G., Goldstein, D., Lam, A., Zanetti, K.A., Ye, Q.H., Qin, L.X., Croce, C.M. et al. 2008. Identification of metastasis-related microRNAs in hepatocellular carcinoma. *Hepatology (Baltimore, Md)* **47**: 897-907.
- Calin, G.A., Ferracin, M., Cimmino, A., Di Leva, G., Shimizu, M., Wojcik, S.E., Iorio, M.V., Visone, R., Sever, N.I., Fabbri, M. et al. 2005. A MicroRNA signature associated with prognosis and progression in chronic lymphocytic leukemia. *The New England journal of medicine* **353**: 1793-1801.
- Chin, M.H., Mason, M.J., Xie, W., Volinia, S., Singer, M., Peterson, C., Ambartsumyan, G., Aimiwu, O., Richter, L., Zhang, J. et al. 2009. Induced pluripotent stem cells and embryonic stem cells are distinguished by gene expression signatures. *Cell stem cell* **5**: 111-123.
- Ciafre, S.A., Galardi, S., Mangiola, A., Ferracin, M., Liu, C.G., Sabatino, G., Negrini, M., Maira, G., Croce, C.M., and Farace, M.G. 2005. Extensive modulation of a set of microRNAs in primary glioblastoma. *Biochemical and biophysical research communications* **334**: 1351-1358.
- Fassan, M., Baffa, R., Palazzo, J.P., Lloyd, J., Crosariol, M., Liu, C.G., Volinia, S., Alder, H., Rugge, M., Croce, C.M. et al. 2009. MicroRNA expression profiling of male breast cancer. *Breast Cancer Res* **11**: R58.
- Garzon, R., Garofalo, M., Martelli, M.P., Briesewitz, R., Wang, L., Fernandez-Cymering, C., Volinia, S., Liu, C.G., Schnittger, S., Haferlach, T. et al. 2008a. Distinctive microRNA signature of acute myeloid leukemia bearing cytoplasmic mutated nucleophosmin. *Proceedings of the National Academy of Sciences of the United States of America* **105**: 3945-3950.
- Garzon, R., Pichiorri, F., Palumbo, T., Iuliano, R., Cimmino, A., Aqeilan, R., Volinia, S., Bhatt, D., Alder, H., Marcucci, G. et al. 2006. MicroRNA fingerprints during human megakaryocytopoiesis. *Proceedings of the National Academy of Sciences of the United States of America* **103**: 5078-5083.
- Garzon, R., Pichiorri, F., Palumbo, T., Visentini, M., Aqeilan, R., Cimmino, A., Wang, H., Sun, H., Volinia, S., Alder, H. et al. 2007. MicroRNA gene expression during retinoic acid-induced differentiation of human acute promyelocytic leukemia. *Oncogene* **26**: 4148-4157.

- Garzon, R., Volinia, S., Liu, C.G., Fernandez-Cymering, C., Palumbo, T., Pichiorri, F., Fabbri, M., Coombes, K., Alder, H., Nakamura, T. et al. 2008b. MicroRNA signatures associated with cytogenetics and prognosis in acute myeloid leukemia. *Blood* **111**: 3183-3189.
- Godlewski, J., Nowicki, M.O., Bronisz, A., Williams, S., Otsuki, A., Nuovo, G., Raychaudhury, A., Newton, H.B., Chiocca, E.A., and Lawler, S. 2008. Targeting of the Bmi-1 oncogene/stem cell renewal factor by microRNA-128 inhibits glioma proliferation and self-renewal. *Cancer research* **68**: 9125-9130.
- He, H., Jazdzewski, K., Li, W., Liyanarachchi, S., Nagy, R., Volinia, S., Calin, G.A., Liu, C.G., Franssila, K., Suster, S. et al. 2005. The role of microRNA genes in papillary thyroid carcinoma. *Proceedings of the National Academy of Sciences of the United States of America* **102**: 19075-19080.
- Iorio, M.V., Ferracin, M., Liu, C.G., Veronese, A., Spizzo, R., Sabbioni, S., Magri, E., Pedriali, M., Fabbri, M., Campiglio, M. et al. 2005. MicroRNA gene expression deregulation in human breast cancer. *Cancer research* **65**: 7065-7070.
- Iorio, M.V., Visone, R., Di Leva, G., Donati, V., Petrocca, F., Casalini, P., Taccioli, C., Volinia, S., Liu, C.G., Alder, H. et al. 2007. MicroRNA signatures in human ovarian cancer. *Cancer research* **67**: 8699-8707.
- Landgraf, P., Rusu, M., Sheridan, R., Sewer, A., Iovino, N., Aravin, A., Pfeffer, S., Rice, A., Kamphorst, A.O., Landthaler, M. et al. 2007. A mammalian microRNA expression atlas based on small RNA library sequencing. *Cell* **129**: 1401-1414.
- Papadopoulos, G.L., Alexiou, P., Maragkakis, M., Reczko, M., and Hatzigeorgiou, A.G. 2009. DIANA-mirPath: Integrating human and mouse microRNAs in pathways. *Bioinformatics (Oxford, England)* **25**: 1991-1993.
- Petrocca, F., Visone, R., Onelli, M.R., Shah, M.H., Nicoloso, M.S., de Martino, I., Iliopoulos, D., Pillozzi, E., Liu, C.G., Negrini, M. et al. 2008. E2F1-regulated microRNAs impair TGFbeta-dependent cell-cycle arrest and apoptosis in gastric cancer. *Cancer cell* **13**: 272-286.
- Pichiorri, F., Suh, S.S., Ladetto, M., Kuehl, M., Palumbo, T., Drandi, D., Taccioli, C., Zanesi, N., Alder, H., Hagan, J.P. et al. 2008. MicroRNAs regulate critical genes associated with multiple myeloma pathogenesis. *Proceedings of the National Academy of Sciences of the United States of America* **105**: 12885-12890.
- Pineau, P., Volinia, S., McJunkin, K., Marchio, A., Battiston, C., Terris, B., Mazzaferro, V., Lowe, S.W., Croce, C.M., and Dejean, A. miR-221 overexpression contributes to liver tumorigenesis. *Proceedings of the National Academy of Sciences of the United States of America* **107**: 264-269.
- Roldo, C., Missiaglia, E., Hagan, J.P., Falconi, M., Capelli, P., Bersani, S., Calin, G.A., Volinia, S., Liu, C.G., Scarpa, A. et al. 2006. MicroRNA expression abnormalities in pancreatic endocrine and acinar tumors are associated with distinctive pathologic features and clinical behavior. *J Clin Oncol* **24**: 4677-4684.
- Schetter, A.J., Leung, S.Y., Sohn, J.J., Zanetti, K.A., Bowman, E.D., Yanaihara, N., Yuen, S.T., Chan, T.L., Kwong, D.L., Au, G.K. et al. 2008. MicroRNA expression profiles associated with prognosis and therapeutic outcome in colon adenocarcinoma. *Jama* **299**: 425-436.
- Seike, M., Goto, A., Okano, T., Bowman, E.D., Schetter, A.J., Horikawa, I., Mathe, E.A., Jen, J., Yang, P., Sugimura, H. et al. 2009. MiR-21 is an EGFR-regulated anti-apoptotic factor in lung cancer in never-smokers. *Proceedings of the National Academy of Sciences of the United States of America* **106**: 12085-12090.
- Ueda, T., Volinia, S., Okumura, H., Shimizu, M., Taccioli, C., Rossi, S., Alder, H., Liu, C.G., Oue, N., Yasui, W. et al. Relation between microRNA expression and progression and prognosis of gastric cancer: a microRNA expression analysis. *Lancet Oncol* **11**: 136-146.

- Visone, R., Rassenti, L.Z., Veronese, A., Taccioli, C., Costinean, S., Aguda, B.D., Volinia, S., Ferracin, M., Palatini, J., Balatti, V. et al. 2009. Karyotype-specific microRNA signature in chronic lymphocytic leukemia. *Blood* **114**: 3872-3879.
- Volinia, S., Calin, G.A., Liu, C.G., Ambs, S., Cimmino, A., Petrocca, F., Visone, R., Iorio, M., Roldo, C., Ferracin, M. et al. 2006. A microRNA expression signature of human solid tumors defines cancer gene targets. *Proceedings of the National Academy of Sciences of the United States of America* **103**: 2257-2261.
- Yanaihara, N., Caplen, N., Bowman, E., Seike, M., Kumamoto, K., Yi, M., Stephens, R.M., Okamoto, A., Yokota, J., Tanaka, T. et al. 2006. Unique microRNA molecular profiles in lung cancer diagnosis and prognosis. *Cancer cell* **9**: 189-198.
- Zhang, L., Volinia, S., Bonome, T., Calin, G.A., Greshock, J., Yang, N., Liu, C.G., Giannakakis, A., Alexiou, P., Hasegawa, K. et al. 2008. Genomic and epigenetic alterations deregulate microRNA expression in human epithelial ovarian cancer. *Proceedings of the National Academy of Sciences of the United States of America* **105**: 7004-7009.
